# Supplementary material
Source: Springer Nature journal article supplement (https://www.springermedizin.de/resource/supplementary/12889_2011_3393_MOESM2_ESM.pdf/9488842)
Supplement: MOESM2 [file 9488842]

## **Interviews with undocumented migrants**

- Motivation for migration
- Family relations
- Work and living conditions
- Network with Danish citizens and undocumented migrants
- Health complaints
- Mental health problems
- Experiences with the Danish healthcare system
- Formal and informal barriers to healthcare\*
- Alternative health-seeking strategies\*
- Experiences with informal networks of healthcare professionals
- Thoughts about the future

## **Interviews with ER nurses**

- Experiences of treating undocumented migrants
- Medical needs of undocumented migrants
- Hospital guidelines on treatment of undocumented migrants
- Codes of medical ethics

\*Also discussed with ER nurses.
